# Supplementary material for: Well-Being and Resources of Minors With Refugee Background in Comparison to Minors With Migration or Native Background
Source: Atypon-hosted journal article supplement (doi:10.1027/2512-8442/a000099), 2022-01-01
Supplement: 2512-8442_a000099_esm1.pdf [file 2512-8442_a000099_esm1.pdf]

Supplemental Materials for

**Well-Being and Resources of Minors With Refugee Background in Comparison to Minors With Migration or Native Background**

**ESM 1**

**ESM 1.1 Reliability of the Subscales of the QARCA**

*Cronbach’s Alpha of the Subscales of the QARCA for the Total Sample and for the Subsamples RM, NM and MM separately*

| Scales<br>(Example items)                                                                   | Total | RM  | NM  | MM  |
|---------------------------------------------------------------------------------------------|-------|-----|-----|-----|
| Optimism<br>("Even if I have problems, I see the positive side")                            | .83   | .79 | .84 | .84 |
| Self-efficacy<br>("I can reach a lot with my ability")                                      | .88   | .85 | .89 | .88 |
| Empathy<br>("I try hard to understand others")                                              | .83   | .78 | .82 | .84 |
| Self-esteem<br>("I am proud of myself")                                                     | .87   | .77 | .88 | .87 |
| Sense of coherence<br>("I think my life makes sense")                                       | .80   | .78 | .80 | .79 |
| Self-control<br>("I can concentrate well on my tasks")                                      | .74   | .78 | .71 | .75 |
| Parental support<br>(„My parents can comfort me well“)                                      | .91   | .88 | .91 | .90 |
| Authoritative parenting<br>(„My parents are warmhearted, but they also set limits form me“) | .79   | .82 | .77 | .79 |
| Integration into peer group<br>("I think others of my age like me")                         | .83   | .76 | .62 | .83 |
| School integration<br>("My classmates are nice to me")                                      | .89   | .89 | .90 | .90 |

*Note.* QARCA = Questionnaire to Assess Resources for Children and Adolescents. RM = refugee minors, MM = immigrant minors, NM = native minors.

**ESM 1.2 Correlations**

*Correlations (Pearson) for Study Variables*

| Variable                             | <i>n</i> | 1     | 2     | 3     | 4     | 5    | 6    | 7    | 8    | 9    | 10   | 11   | 12 | 13 | 14 | 15 | 16 | 17 | 18 | 19 |
|--------------------------------------|----------|-------|-------|-------|-------|------|------|------|------|------|------|------|----|----|----|----|----|----|----|----|
| 1. Well-being                        |          | -     |       |       |       |      |      |      |      |      |      |      |    |    |    |    |    |    |    |    |
| Demographics                         |          |       |       |       |       |      |      |      |      |      |      |      |    |    |    |    |    |    |    |    |
| 2. Gender <sup>a</sup>               | 1602     | .17*  | -     |       |       |      |      |      |      |      |      |      |    |    |    |    |    |    |    |    |
| 3. Age                               | 1602     | -.22* | .04   | -     |       |      |      |      |      |      |      |      |    |    |    |    |    |    |    |    |
| 4. Migration background <sup>b</sup> | 1602     | -.06  | -.01  | .04   | -     |      |      |      |      |      |      |      |    |    |    |    |    |    |    |    |
| 5. Native <sup>c</sup>               | 1602     | .17*  | .00   | -.05  | -.76* | -    |      |      |      |      |      |      |    |    |    |    |    |    |    |    |
| Social resources                     |          |       |       |       |       |      |      |      |      |      |      |      |    |    |    |    |    |    |    |    |
| 6. Parental support                  | 1563     | .47*  | -.01  | -.18* | -.03  | .17* | -    |      |      |      |      |      |    |    |    |    |    |    |    |    |
| 7. Authoritative parenting           | 1563     | .33*  | .02   | -.13* | -.02  | .14* | .70* | -    |      |      |      |      |    |    |    |    |    |    |    |    |
| 8. Integration into peer group       | 1572     | .44*  | -.03  | -.07* | .00   | .16* | .51* | .49* | -    |      |      |      |    |    |    |    |    |    |    |    |
| 9. School integration                | 1573     | .46*  | -.03  | -.23* | -.06  | .09* | .47* | .46* | .60* | -    |      |      |    |    |    |    |    |    |    |    |
| Personal resources                   |          |       |       |       |       |      |      |      |      |      |      |      |    |    |    |    |    |    |    |    |
| 10. Optimism                         | 1585     | .54*  | .12*  | -.14* | -.02  | .09* | .49* | .46* | .48* | .52* | -    |      |    |    |    |    |    |    |    |    |
| 11. Self-efficacy                    | 1568     | .41*  | .08*  | -.11* | -.01  | .05  | .42* | .42* | .46* | .47* | .69* | -    |    |    |    |    |    |    |    |    |
| 12. Empathy                          | 1573     | .16*  | -.13* | -.03  | .02   | .09* | .33* | .38* | .42* | .37* | .43* | .45* | -  |    |    |    |    |    |    |    |

|                         |      |       |      |       |      |       |      |      |      |      |      |      |      |      |      |      |      |      |      |   |
|-------------------------|------|-------|------|-------|------|-------|------|------|------|------|------|------|------|------|------|------|------|------|------|---|
| 13. Sense of coherence  | 1564 | .49*  | .12* | -.07* | .01  | .11*  | .50* | .49* | .51* | .47* | .74* | .70* | .50* | -    |      |      |      |      |      |   |
| 14. Self-esteem         | 1569 | .56*  | .15* | -.25* | -.06 | .04   | .48* | .41* | .44* | .50* | .72* | .60* | .25* | .61* | -    |      |      |      |      |   |
| 15. Self-control        | 1572 | .44*  | .09* | -.20* | -.06 | .09*  | .47* | .47* | .43* | .52* | .63* | .60* | .47* | .63* | .57* | -    |      |      |      |   |
| 16. Religious identity  | 1573 | .12*  | -.01 | -.08* | .08* | -.24* | .15* | .13* | .12* | .20* | .22* | .18* | .16* | .17* | .24* | .19* | -    |      |      |   |
| 17. Religious practice  | 1598 | .08*  | .01  | -.14* | .00  | -.02  | .12* | .13* | .07* | .10* | .15* | .11* | .11* | .12* | .17* | .17* | .57* | -    |      |   |
| Multicultural resources |      |       |      |       |      |       |      |      |      |      |      |      |      |      |      |      |      |      |      |   |
| 18. Ethnic identity     | 836  | .07   | -.05 | -.05  | .20* | -.27* | .17* | .15* | .17* | .15* | .20* | .14* | .16* | .14* | .19* | .09* | .42* | .14* | -    |   |
| 19. Bilingualism        | 1525 | -.10* | .00  | .14*  | .35* | -.49* | -.06 | -.04 | -.06 | -.04 | .01  | .04  | .01  | -.01 | .01  | -.01 | .24* | .09* | .22* | - |

Note. <sup>a</sup> 0 = female, 1 = male. <sup>b</sup> 0 = refugee or native minors, 1 = immigrant minors. <sup>c</sup> 0 = refugee or immigrant minors, 1 = native minors.

\* $p < .01$ .

**ESM 1.3 Regression: Total Sample (Hypotheses 3.1 and 3.2)**

*Regression Coefficients of Personal Resources, Social Resources and Background on Well-being*

| Variable                    | B    | SE  | 95% CI |      | $\beta$ | p    | sr <sup>2</sup> |
|-----------------------------|------|-----|--------|------|---------|------|-----------------|
|                             |      |     | LL     | UL   |         |      |                 |
| <b>Step 1</b>               |      |     |        |      |         |      |                 |
| Age                         | -.07 | .01 | -.09   | -.06 | -.23    | .000 | .06             |
| Gender <sup>a</sup>         | .25  | .03 | .18    | .32  | .18     | .000 | .04             |
| <b>Step 2</b>               |      |     |        |      |         |      |                 |
| Age                         | -.03 | .01 | -.04   | -.02 | -.09    | .000 | .01             |
| Gender <sup>a</sup>         | .15  | .03 | .09    | .20  | .11     | .000 | .02             |
| Optimism                    | .20  | .04 | .13    | .27  | .19     | .000 | .02             |
| Self-efficacy               | -.05 | .03 | -.11   | .01  | -.05    | .107 | .00             |
| Empathy                     | -.14 | .03 | -.20   | -.09 | -.13    | .000 | .02             |
| Self-esteem                 | .18  | .03 | .13    | .24  | .20     | .000 | .03             |
| Sense of coherence          | .12  | .04 | .05    | .19  | .11     | .001 | .01             |
| Self-control                | .05  | .03 | -.02   | .11  | .04     | .147 | .00             |
| Parental support            | .22  | .03 | .16    | .27  | .23     | .000 | .04             |
| Authoritative parenting     | -.13 | .03 | -.19   | -.08 | -.13    | .000 | .01             |
| Integration into peer group | .17  | .03 | .11    | .22  | .15     | .000 | .02             |
| School integration          | .10  | .03 | .05    | .15  | .11     | .000 | .01             |
| Religious identity          | -.01 | .01 | -.03   | .02  | -.01    | .557 | .00             |
| Religious practice          | -.01 | .01 | -.04   | .02  | -.02    | .437 | .00             |
| <b>Step 3</b>               |      |     |        |      |         |      |                 |
| Age                         | -.03 | .01 | -.04   | -.02 | -.09    | .000 | .01             |
| Gender <sup>a</sup>         | .15  | .03 | .09    | .20  | .11     | .000 | .02             |
| Optimism                    | .19  | .04 | .12    | .26  | .19     | .000 | .02             |
| Self-efficacy               | -.04 | .03 | -.10   | .02  | -.04    | .154 | .00             |
| Empathy                     | -.15 | .03 | -.20   | -.10 | -.14    | .000 | .02             |
| Self-esteem                 | .20  | .03 | .14    | .25  | .21     | .000 | .03             |
| Sense of coherence          | .10  | .04 | .03    | .17  | .10     | .003 | .01             |
| Self-control                | .05  | .03 | -.01   | .11  | .04     | .116 | .00             |
| Parental support            | .20  | .03 | .14    | .25  | .21     | .000 | .03             |
| Authoritative parenting     | -.14 | .03 | -.19   | -.08 | -.13    | .000 | .01             |
| Integration into peer group | .15  | .03 | .09    | .21  | .14     | .000 | .02             |
| School integration          | .11  | .03 | .06    | .16  | .11     | .000 | .01             |

|                                   |      |     |      |     |      |      |     |
|-----------------------------------|------|-----|------|-----|------|------|-----|
| Religious identity                | .02  | .01 | -.01 | .04 | .03  | .238 | .00 |
| Religious practice                | -.02 | .01 | -.05 | .00 | -.04 | .108 | .00 |
| Native background <sup>b</sup>    | .21  | .05 | .12  | .31 | .16  | .000 | .01 |
| Migration background <sup>c</sup> | .12  | .05 | .03  | .22 | .09  | .010 | .00 |

---

*Note.*  $N = 1495$ . CI = confidence interval; LL = lower limit; UL = upper limit.

<sup>a</sup> 0 = female, 1 = male. <sup>b</sup> 0 = refugee or immigrant minors, 1 = native minors. <sup>c</sup> 0 = refugee or native minors, 1 = immigrant minors.

**ESM 1.4 Regression: Minors with a Migration Background (Hypotheses 4.1 and 4.2)**

*Regression Coefficients of Multicultural, Social and Personal Resources on Well-being among Minors with a Migration Background*

| Variable                    | B    | SE  | 95% CI |      | $\beta$ | p     | sr <sup>2</sup> |
|-----------------------------|------|-----|--------|------|---------|-------|-----------------|
|                             |      |     | LL     | UL   |         |       |                 |
| Step 1                      |      |     |        |      |         |       |                 |
| Age                         | -.07 | .02 | -.10   | -.04 | -.21    | .000  | .04             |
| Gender <sup>a</sup>         | .35  | .07 | .22    | .48  | .24     | .000  | .06             |
| Step 2                      |      |     |        |      |         |       |                 |
| Age                         | -.07 | .02 | -.10   | -.04 | -.20    | .000  | .04             |
| Gender                      | .35  | .07 | .22    | .48  | .24     | .000  | .06             |
| Ethnic identity             | .00  | .04 | -.06   | .07  | .01     | .897  | .00             |
| Bilingualism <sup>b</sup>   | -.01 | .07 | -.14   | .12  | -.01    | .869  | .00             |
| Step 3                      |      |     |        |      |         |       |                 |
| Age                         | -.02 | .01 | -.05   | .00  | -.06    | .095  | .01             |
| Gender                      | .21  | .05 | .10    | .31  | .14     | .000  | .04             |
| Ethnic identity             | -.10 | .03 | -.16   | -.04 | -.13    | .001  | .03             |
| Bilingualism                | -.03 | .05 | -.14   | .07  | -.02    | .518  | .00             |
| Optimism                    | .17  | .07 | .04    | .30  | .16     | .010  | .02             |
| Self-efficacy               | -.05 | .06 | -.16   | .06  | -.05    | .354  | .00             |
| Empathy                     | -.14 | .05 | -.23   | -.05 | -.13    | .002  | .02             |
| Self-esteem                 | .18  | .05 | .07    | .28  | .18     | .001  | .02             |
| Sense of coherence          | .13  | .07 | .00    | .26  | .11     | .057  | .01             |
| Self-control                | -.01 | .06 | -.12   | .10  | -.01    | .860  | .00             |
| Parental support            | .28  | .05 | .18    | .38  | .29     | .000  | .07             |
| Authoritative parenting     | -.11 | .05 | -.21   | .00  | -.10    | .040  | .01             |
| Integration into peer group | .18  | .05 | .08    | .28  | .16     | .000  | .03             |
| School integration          | .13  | .05 | .03    | .22  | .13     | 0.007 | .02             |
| Religious identity          | .02  | .02 | -.03   | .06  | .03     | 0.471 | .00             |
| Religious practice          | -.02 | .03 | -.07   | .03  | -.03    | 0.535 | .00             |

Note. N = 439. CI = confidence interval; LL = lower limit; UL = upper limit.

<sup>a</sup> 0 = female, 1 = male. <sup>b</sup> 0 = no bilingualism, 1 = bilingualism.
